# Supplementary material
Source: HighWire-hosted journal article supplement (https://bmjopen.bmj.com/content/8/5/e020767)
Supplement: inline-supplementary-material-1 [file inline-supplementary-material-1.pdf]

# **Relevance of *MTHFR* polymorphisms with response to fluoropyrimidine-based chemotherapy in esophagogastric cancer: a meta-analysis**

Lei Zhong,<sup>1</sup> Qi Fu,<sup>2</sup> Shu Zhou,<sup>3</sup> Lu Chen,<sup>1</sup> Qian Peng<sup>4</sup>

<sup>1</sup> Personalized Drug Therapy Key Laboratory of Sichuan Province, Sichuan Academy of Medical Sciences and Sichuan Provincial People's Hospital, Sichuan 610072, China

<sup>2</sup> State Key Laboratory of Biotherapy and Cancer Center, West China Hospital, West China Medical School, Sichuan University, Sichuan 610072, China

<sup>3</sup> School of Life Sciences and Key Laboratory of Bio-resources and Eco-environment, Ministry of Education, Sichuan University, Sichuan 610041, China

<sup>4</sup> Cancer Center, Sichuan Academy of Medical Sciences and Sichuan Provincial People's Hospital, Sichuan 610072, China

**Correspondence to:** Dr. Qian Peng, **e-mail:** pengqian0522@163.com

**Address for correspondence:** Sichuan Academy of Medical Sciences and Sichuan Provincial People's Hospital, No. 32 West Second Section First Ring Road, Chengdu, Sichuan 610072, China. Telephone: +86-028-87393405.

**Keywords:** Esophagogastric cancer; *MTHFR*; Polymorphism; Fluoropyrimidine; Chemotherapy response

**Total number of words:** 2164

**Total number of figures:** 4 (+3 Supplementary figures)

**Total number of tables:** 3

**Supplementary Table 1** PubMed search strategies

| Database | Time span of search               | Search strategy                                                                                                                                                                                                                                                                                                                                                                                                                                                                                                                                                                        |
|----------|-----------------------------------|----------------------------------------------------------------------------------------------------------------------------------------------------------------------------------------------------------------------------------------------------------------------------------------------------------------------------------------------------------------------------------------------------------------------------------------------------------------------------------------------------------------------------------------------------------------------------------------|
| PubMed   | from inception up to October 2017 | <ol style="list-style-type: none"> <li>1. methylene tetrahydrofolate reductase or Methylene tetrahydrofolate reductase or MTHFR or folate [All Fields]</li> <li>2. fluorouracil or fluorouracil or 5-FU or tegafur or UFT or capecitabine or Xeloda or fluoropyrimidine or fluoropyrimidine [All Fields]</li> <li>3. Pharmacogenetic* or polymorphism* or genetic* or variant* or genotype* or mutation* or Single Nucleotide [All Fields]</li> <li>4. gastric or esophageal or esophagogastric or gastroesophageal or stomach [All Fields]</li> <li>5. 1 and 2 and 3 and 4</li> </ol> |

### **Supplementary Figure legends**

**Supplementary Figure S1** Forest plot of *MTHFR* polymorphisms with the response to fluoropyrimidine-based chemotherapy. A. Forest plot for the dominant model of *MTHFR* C677T variant; B. Forest plot for the recessive model of *MTHFR* C677T variant; C. Forest plot for the dominant model of *MTHFR* A1298C variant; D. Forest plot for the recessive model of *MTHFR* A1298C variant.

**Supplementary Figure S2** Sensitivity analysis. A. Sensitivity analysis for the dominant model of *MTHFR* C677T variant; B. Sensitivity analysis for the recessive model of *MTHFR* C677T variant; C. Sensitivity analysis for the dominant model of *MTHFR* A1298C variant; D. Sensitivity analysis for the recessive model of *MTHFR* A1298C variant.

**Supplementary Figure S3** Publication bias. A. Begg's funnel plot of the publication bias in the dominant model of *MTHFR* C677T polymorphism; B. Begg's funnel plot of the publication bias in the recessive model of *MTHFR* C677T polymorphism; C. Begg's funnel plot of the publication bias in the dominant model of *MTHFR* A1298C polymorphism; D. Begg's funnel plot of the publication bias in the recessive model of *MTHFR* A1298C polymorphism.
